# Supplementary material for: Transparency ethics in practice: Revisiting financial conflicts of interest disclosure forms in clinical practice guidelines
Source: PubMed Central journal article supplement (PMC5571907; doi:10.1371/journal.pone.0182856), 2017-08-25
Supplement: pone.0182856.s002.pdf [file pone.0182856.s002.pdf]

# FINANCIAL CONFLICT OF INTEREST DISCLOSURE FORM

## SCENIC CONSENSUS MEETING 2014

Name: \_\_\_\_\_

### Objective

The purpose of this guideline is to provide guidance about financial conflict of interest disclosure. Use it to assist in identifying and disclosing actual, apparent or potential financial conflict of interests over the past 24 months.

### Definitions (IOM 2009)

|                                |                                                                                                                                                                                                                                                                                                                                                                                                                                                                                                                       |
|--------------------------------|-----------------------------------------------------------------------------------------------------------------------------------------------------------------------------------------------------------------------------------------------------------------------------------------------------------------------------------------------------------------------------------------------------------------------------------------------------------------------------------------------------------------------|
| Conflict of interest           | A set of circumstances that creates a risk that professional judgments or action regarding primary interest will be unduly influenced by a secondary interest                                                                                                                                                                                                                                                                                                                                                         |
| Primary interest               | The primary interest that conflict of interest policies seek to protect varies according to the purpose of a professional activity. Primary interests include promoting and protecting the integrity of research, and the welfare of patients. These primary interests are sometimes stated as ends or goals (e.g., promoting patient welfare), as obligations (e.g., the physician's obligation to promote patient welfare), or as rights (e.g., the patient's right to have the doctor promote his or her welfare). |
| Secondary interest             | Secondary interests may include not only financial gain but also the desire for professional advancement, recognition for personal achievement, and favors to friends and family or to students and colleagues. The secondary interests are objectionable only when they have greater weight than the primary interest in professional decision making                                                                                                                                                                |
| Conflict                       | It is a set of circumstances or relationships that create or increase the risk that the primary interests will be neglected as a result of the pursuit of secondary interests. A conflict of interest exists whether or not a particular individual or institution is actually influenced by the secondary interest.                                                                                                                                                                                                  |
| Actual conflict of interest    | Arises when secondary interests influence your ability to act with integrity, objectivity, and independence in regards to the assigned task.                                                                                                                                                                                                                                                                                                                                                                          |
| Apparent conflict of interest  | Arises when secondary interests appear to influence your ability to act with integrity, objectivity, and independence towards the assigned task.                                                                                                                                                                                                                                                                                                                                                                      |
| Potential conflict of interest | Arises when you become aware of secondary interests that if acted upon may influence your ability to act with integrity, objectivity, and independence in completing an assigned task.                                                                                                                                                                                                                                                                                                                                |

## Determination of conflict of interest

In order to determine if any type of a conflict listed above is possible with your assigned task, ask yourself the following question.

*“Would my peers or the general public consider my presentation (judgment) to be biased or would they trust my decision if they knew of this particular situation?”*

## Disclosure

You are expected to disclose any potential, apparent or actual interests or connections (business, personal, professional, volunteer or other) that appear to influence your ability to act with integrity, objectivity, and independence towards the assigned task.

**Over the past 24 months and future 12 months, have you or your spouse received financial support from a commercial entity for any clinical or research activity connected with this task or do you have any other financial relationship with a commercial entity, which might be perceived as having a connection with this task?**

**NO** - I do not have any relevant financial relationships with any commercial interests. I agree to immediately notify the CAG National Office if a significant financial interest develops at any time prior to or during my participation in the above educational event, presentation or task

**YES** - If yes, please complete the attached table listing identifying which company(ies), what was received and for what role? If the company(ies) is not listed, please provide the additional information in the allotted space below.

Signature: \_\_\_\_\_

Date: \_\_\_\_\_

## FINANCIAL CONFLICT OF INTEREST DISCLOSURE FORM

| COMMERCIAL INTEREST                                  | FOR WHAT ROLE?                                               | HOW MUCH? | WHAT WAS RECEIVED?          | WHEN?             |                           |                            |  |
|------------------------------------------------------|--------------------------------------------------------------|-----------|-----------------------------|-------------------|---------------------------|----------------------------|--|
| Please indicate company number, or specify if needed | Check appropriate answer, or specify if answer not available |           |                             |                   |                           |                            |  |
| <b>Example:<br/>Company A</b>                        | <i>Speaker's bureau</i>                                      | ✓         | <i>&lt; 100 US\$</i>        | <b>Honorarium</b> | <i>Current</i>            | ✓                          |  |
|                                                      | <i>Consultant</i>                                            |           | <i>100 to 499 US\$</i>      |                   | <i>Past &lt; 12 month</i> |                            |  |
|                                                      | <i>Research support</i>                                      |           | <i>500 to 999 US\$</i>      |                   | ✓                         | <i>Past 12 to 24 month</i> |  |
|                                                      | <i>Advisory board</i>                                        |           | <i>1,000 to 4,999 US\$</i>  |                   |                           |                            |  |
|                                                      | <i>Employee</i>                                              |           | <i>5,000 to 10,000 US\$</i> |                   |                           |                            |  |
|                                                      | <i>Stockholder</i>                                           |           | <i>&gt; 10,000 US\$</i>     |                   |                           | <i>Future 12 month</i>     |  |
|                                                      | <i>Other:</i>                                                |           | <i>Other:</i>               |                   |                           |                            |  |

### List of companies in alphabetical order and identification number

|           |                         |           |                                  |
|-----------|-------------------------|-----------|----------------------------------|
| <b>1</b>  | Akorn                   | <b>15</b> | Johnson and Johnson              |
| <b>2</b>  | Altaire Pharma          | <b>16</b> | Lex Pharmaceuticals              |
| <b>3</b>  | Amend Chemical Company  | <b>17</b> | LifeCore Biomedical              |
| <b>4</b>  | American Regent         | <b>18</b> | Mauna Kea Technology- Cellvizio  |
| <b>5</b>  | Baker JT                | <b>19</b> | Medivators                       |
| <b>6</b>  | Boston scientific       | <b>20</b> | Medsica                          |
| <b>7</b>  | Conmed                  | <b>21</b> | Olympus                          |
| <b>8</b>  | Convidien               | <b>22</b> | Ovesco                           |
| <b>9</b>  | Cook                    | <b>23</b> | Pentax                           |
| <b>10</b> | EndoChoice              | <b>24</b> | Professional Compounding centers |
| <b>11</b> | Endostat                | <b>25</b> | Seikakagu                        |
| <b>12</b> | Erbe                    | <b>26</b> | TOP                              |
| <b>13</b> | Fagron Inc              | <b>27</b> | Valley Lab                       |
| <b>14</b> | Fuji, Fujifilm, Fujinon | <b>28</b> | US endoscopy                     |

## Financial conflict of interest disclosure table

| COMMERCIAL INTEREST                               | FOR WHAT ROLE?   | HOW MUCH?            | WHAT WAS RECEIVED? | WHEN?               |
|---------------------------------------------------|------------------|----------------------|--------------------|---------------------|
| Company number:<br>_____<br>or, specify:<br>_____ | Speaker's bureau | < 100 US\$           |                    | Current             |
|                                                   | Consultant       | 100 to 499 US\$      |                    |                     |
|                                                   | Research support | 500 to 999 US\$      |                    | Past < 12 month     |
|                                                   | Advisory board   | 1,000 to 4,999 US\$  |                    |                     |
|                                                   | Employee         | 5,000 to 10,000 US\$ |                    | Past 12 to 24 month |
|                                                   | Stockholder      | > 10,000 US\$        |                    |                     |
| Other:                                            | Other:           | Future 12 month      |                    |                     |
| Company number:<br>_____<br>or, specify:<br>_____ | Speaker's bureau | < 100 US\$           |                    | Current             |
|                                                   | Consultant       | 100 to 499 US\$      |                    |                     |
|                                                   | Research support | 500 to 999 US\$      |                    | Past < 12 month     |
|                                                   | Advisory board   | 1,000 to 4,999 US\$  |                    |                     |
|                                                   | Employee         | 5,000 to 10,000 US\$ |                    | Past 12 to 24 month |
|                                                   | Stockholder      | > 10,000 US\$        |                    |                     |
| Other:                                            | Other:           | Future 12 month      |                    |                     |
| Company number:<br>_____<br>or, specify:<br>_____ | Speaker's bureau | < 100 US\$           |                    | Current             |
|                                                   | Consultant       | 100 to 499 US\$      |                    |                     |
|                                                   | Research support | 500 to 999 US\$      |                    | Past < 12 month     |
|                                                   | Advisory board   | 1,000 to 4,999 US\$  |                    |                     |
|                                                   | Employee         | 5,000 to 10,000 US\$ |                    | Past 12 to 24 month |
|                                                   | Stockholder      | > 10,000 US\$        |                    |                     |
| Other:                                            | Other:           | Future 12 month      |                    |                     |
| Company number:<br>_____<br>or, specify:<br>_____ | Speaker's bureau | < 100 US\$           |                    | Current             |
|                                                   | Consultant       | 100 to 499 US\$      |                    |                     |
|                                                   | Research support | 500 to 999 US\$      |                    | Past < 12 month     |
|                                                   | Advisory board   | 1,000 to 4,999 US\$  |                    |                     |
|                                                   | Employee         | 5,000 to 10,000 US\$ |                    | Past 12 to 24 month |
|                                                   | Stockholder      | > 10,000 US\$        |                    |                     |
| Other:                                            | Other:           | Future 12 month      |                    |                     |
| Company number:<br>_____<br>or, specify:<br>_____ | Speaker's bureau | < 100 US\$           |                    | Current             |
|                                                   | Consultant       | 100 to 499 US\$      |                    |                     |
|                                                   | Research support | 500 to 999 US\$      |                    | Past < 12 month     |
|                                                   | Advisory board   | 1,000 to 4,999 US\$  |                    |                     |
|                                                   | Employee         | 5,000 to 10,000 US\$ |                    | Past 12 to 24 month |
|                                                   | Stockholder      | > 10,000 US\$        |                    |                     |
| Other:                                            | Other:           | Future 12 month      |                    |                     |

| COMMERCIAL INTEREST                               | FOR WHAT ROLE?   | HOW MUCH?            | WHAT WAS RECEIVED? | WHEN?               |
|---------------------------------------------------|------------------|----------------------|--------------------|---------------------|
| Company number:<br>_____<br>or, specify:<br>_____ | Speaker's bureau | < 100 US\$           |                    | Current             |
|                                                   | Consultant       | 100 to 499 US\$      |                    | Past < 12 month     |
|                                                   | Research support | 500 to 999 US\$      |                    | Past 12 to 24 month |
|                                                   | Advisory board   | 1,000 to 4,999 US\$  |                    |                     |
|                                                   | Employee         | 5,000 to 10,000 US\$ |                    |                     |
|                                                   | Stockholder      | > 10,000 US\$        |                    |                     |
| Other:                                            | Other:           | Future 12 month      |                    |                     |
| Company number:<br>_____<br>or, specify:<br>_____ | Speaker's bureau | < 100 US\$           |                    | Current             |
|                                                   | Consultant       | 100 to 499 US\$      |                    | Past < 12 month     |
|                                                   | Research support | 500 to 999 US\$      |                    | Past 12 to 24 month |
|                                                   | Advisory board   | 1,000 to 4,999 US\$  |                    |                     |
|                                                   | Employee         | 5,000 to 10,000 US\$ |                    |                     |
|                                                   | Stockholder      | > 10,000 US\$        |                    |                     |
| Other:                                            | Other:           | Future 12 month      |                    |                     |
| Company number:<br>_____<br>or, specify:<br>_____ | Speaker's bureau | < 100 US\$           |                    | Current             |
|                                                   | Consultant       | 100 to 499 US\$      |                    | Past < 12 month     |
|                                                   | Research support | 500 to 999 US\$      |                    | Past 12 to 24 month |
|                                                   | Advisory board   | 1,000 to 4,999 US\$  |                    |                     |
|                                                   | Employee         | 5,000 to 10,000 US\$ |                    |                     |
|                                                   | Stockholder      | > 10,000 US\$        |                    |                     |
| Other:                                            | Other:           | Future 12 month      |                    |                     |
| Company number:<br>_____<br>or, specify:<br>_____ | Speaker's bureau | < 100 US\$           |                    | Current             |
|                                                   | Consultant       | 100 to 499 US\$      |                    | Past < 12 month     |
|                                                   | Research support | 500 to 999 US\$      |                    | Past 12 to 24 month |
|                                                   | Advisory board   | 1,000 to 4,999 US\$  |                    |                     |
|                                                   | Employee         | 5,000 to 10,000 US\$ |                    |                     |
|                                                   | Stockholder      | > 10,000 US\$        |                    |                     |
| Other:                                            | Other:           | Future 12 month      |                    |                     |
| Company number:<br>_____<br>or, specify:<br>_____ | Speaker's bureau | < 100 US\$           |                    | Current             |
|                                                   | Consultant       | 100 to 499 US\$      |                    | Past < 12 month     |
|                                                   | Research support | 500 to 999 US\$      |                    | Past 12 to 24 month |
|                                                   | Advisory board   | 1,000 to 4,999 US\$  |                    |                     |
|                                                   | Employee         | 5,000 to 10,000 US\$ |                    |                     |
|                                                   | Stockholder      | > 10,000 US\$        |                    |                     |
| Other:                                            | Other:           | Future 12 month      |                    |                     |
| Company number:<br>_____<br>or, specify:<br>_____ | Speaker's bureau | < 100 US\$           |                    | Current             |
|                                                   | Consultant       | 100 to 499 US\$      |                    | Past < 12 month     |
|                                                   | Research support | 500 to 999 US\$      |                    | Past 12 to 24 month |
|                                                   | Advisory board   | 1,000 to 4,999 US\$  |                    |                     |
|                                                   | Employee         | 5,000 to 10,000 US\$ |                    |                     |
|                                                   | Stockholder      | > 10,000 US\$        |                    |                     |
| Other:                                            | Other:           | Future 12 month      |                    |                     |

| COMMERCIAL INTEREST                         | FOR WHAT ROLE?   | HOW MUCH?            | WHAT WAS RECEIVED? | WHEN?               |
|---------------------------------------------|------------------|----------------------|--------------------|---------------------|
| Company number: _____<br>or, specify: _____ | Speaker's bureau | < 100 US\$           |                    | Current             |
|                                             | Consultant       | 100 to 499 US\$      |                    | Past < 12 month     |
|                                             | Research support | 500 to 999 US\$      |                    | Past 12 to 24 month |
|                                             | Advisory board   | 1,000 to 4,999 US\$  |                    |                     |
|                                             | Employee         | 5,000 to 10,000 US\$ |                    |                     |
|                                             | Stockholder      | > 10,000 US\$        |                    |                     |
| Other:                                      | Other:           | Future 12 month      |                    |                     |
| Company number: _____<br>or, specify: _____ | Speaker's bureau | < 100 US\$           |                    | Current             |
|                                             | Consultant       | 100 to 499 US\$      |                    | Past < 12 month     |
|                                             | Research support | 500 to 999 US\$      |                    | Past 12 to 24 month |
|                                             | Advisory board   | 1,000 to 4,999 US\$  |                    |                     |
|                                             | Employee         | 5,000 to 10,000 US\$ |                    |                     |
|                                             | Stockholder      | > 10,000 US\$        |                    |                     |
| Other:                                      | Other:           | Future 12 month      |                    |                     |
| Company number: _____<br>or, specify: _____ | Speaker's bureau | < 100 US\$           |                    | Current             |
|                                             | Consultant       | 100 to 499 US\$      |                    | Past < 12 month     |
|                                             | Research support | 500 to 999 US\$      |                    | Past 12 to 24 month |
|                                             | Advisory board   | 1,000 to 4,999 US\$  |                    |                     |
|                                             | Employee         | 5,000 to 10,000 US\$ |                    |                     |
|                                             | Stockholder      | > 10,000 US\$        |                    |                     |
| Other:                                      | Other:           | Future 12 month      |                    |                     |
| Company number: _____<br>or, specify: _____ | Speaker's bureau | < 100 US\$           |                    | Current             |
|                                             | Consultant       | 100 to 499 US\$      |                    | Past < 12 month     |
|                                             | Research support | 500 to 999 US\$      |                    | Past 12 to 24 month |
|                                             | Advisory board   | 1,000 to 4,999 US\$  |                    |                     |
|                                             | Employee         | 5,000 to 10,000 US\$ |                    |                     |
|                                             | Stockholder      | > 10,000 US\$        |                    |                     |
| Other:                                      | Other:           | Future 12 month      |                    |                     |
| Company number: _____<br>or, specify: _____ | Speaker's bureau | < 100 US\$           |                    | Current             |
|                                             | Consultant       | 100 to 499 US\$      |                    | Past < 12 month     |
|                                             | Research support | 500 to 999 US\$      |                    | Past 12 to 24 month |
|                                             | Advisory board   | 1,000 to 4,999 US\$  |                    |                     |
|                                             | Employee         | 5,000 to 10,000 US\$ |                    |                     |
|                                             | Stockholder      | > 10,000 US\$        |                    |                     |
| Other:                                      | Other:           | Future 12 month      |                    |                     |

Others:

---



---



---



---



---



---

We thank you for taking the time to complete this questionnaire.
